# 1 Covariance-based decoding reveals content-specific feature integration and top-down 2 processing during visual imagery

3  
4 Francesco Mantegna <sup>1,4</sup> \*, Emanuele Olivetti <sup>2,4</sup>, Philipp Schwedhelm <sup>3,4</sup>, Daniel Baldauf <sup>4</sup>

5  
6 <sup>1</sup> Department of Psychology, New York University, New York, NY, USA.

7 <sup>2</sup> NeuroInformatics Laboratory (NILab), Bruno Kessler Foundation (FBK), Trento, Italy

8 <sup>3</sup> Functional Imaging Laboratory, German Primate Center – Leibniz Institute for Primate Research,  
9 Goettingen, Germany

10 <sup>4</sup> Center for Mind/Brain Sciences (CIMEC), University of Trento, Trento, Italy

11  
12 \* Corresponding author ([fm1672@nyu.edu](mailto:fm1672@nyu.edu))

## 13 14 **Abstract**

15  
16 When we internally generate mental images, we need to combine multiple features into a whole.  
17 Direct evidence for such feature integration during visual imagery is still lacking. Moreover,  
18 cognitive control mechanisms, including memory and attention, exert top-down influences on the  
19 perceptual system during mental images generation. However, it is unclear whether such top-down  
20 processing is content-specific or not. Feature integration and top-down processing involve short-  
21 range connectivity within visual areas, and long-range connectivity between control and visual  
22 areas, respectively. Here, we used a minimally constrained experimental paradigm wherein  
23 imagery categories were prompted using visual word cues only, and we decoded face versus place  
24 imagery based on their underlying connectivity patterns. Our results show that face and place  
25 imagery can be decoded from both short-range and long-range connections. These findings suggest  
26 that feature integration does not require an external stimulus but occurs also for purely internally  
27 generated images. Furthermore, control and visual areas exchange information specifically tailored  
28 to imagery content.

## 29 30 **Teaser**

31  
32 Decoding visual imagery from brain connectivity reveals a content-specific interconnected neural  
33 code for internal image generation.

34  
35  
36  
37  
38  
39  
40  
41  
42  
43  
44  
45  
46

## 47 Introduction

48

49 Our brain has a remarkable capacity to internally generate vivid mental representations in the  
50 complete absence of external sensory stimulation. Imagery is very useful whenever we need to  
51 process information that is not accessible in the present. For example, imagery allows us to re-  
52 instantiate information encountered in the past or to anticipate information that we will encounter  
53 in the future, without constantly requiring an external reference. In particular, visual imagery  
54 involves the internal generation of mental images <sup>1</sup>. We can generate rich, vivid, and detailed  
55 images in our mind's eye, which can contain precise color and shape information. For example, we  
56 can internally visualize a well-known place or a familiar person's face. In both cases, the imagined  
57 percept may involve visual details with particular shapes, colors, hues, textures, and shading. This  
58 implies that multiple visual features have to be integrated to yield a complex and coherent visual  
59 representation <sup>2</sup>.

60

61 Feature integration requires communication between brain areas that locally represent specific  
62 visual features of the imaginandum. Various areas need to communicate in order to combine  
63 dispersed feature representations into a coherent visual percept. Information integration is at the  
64 core of a cortical processing model proposed by Tononi and colleagues <sup>3</sup>. This model is supported  
65 by computer simulations suggesting that reciprocal information exchange across areas in the visual  
66 cortex is the basic computational mechanism for information integration <sup>4</sup>. This computation is  
67 biologically plausible insofar as areas in the visual cortex are strongly interconnected <sup>5</sup>. There is  
68 also empirical evidence for the fact that patterns of neuronal synchronization reflect information  
69 integration during visual perception <sup>6</sup>. However, it is unknown whether the same feature integration  
70 mechanisms are also employed when generating mental images internally, in the absence of any  
71 sensory stimulation. Neuroimaging studies have shown that areas that locally represent specific  
72 features during visual perception also represent the same features during visual imagery. For  
73 example, the primary visual cortex represents spatiotopic information <sup>7</sup>, area MT represents motion  
74 <sup>8</sup>, while specialized areas in the inferior-temporal cortex represent faces and places, respectively <sup>9</sup>.  
75 Therefore, the cross-talk between visual areas may be the very basis of complex mental image  
76 formation.

77

78 Short-range connections between visual areas alone are presumably not sufficient to achieve  
79 feature integration when there is no external stimulus. Instead, visual areas may be supported by  
80 cognitive control mechanisms, such as memory and attention, exerting top-down influences during  
81 imagery, as suggested in the model proposed by Sakai and Miyashita <sup>10</sup>. In particular, their model  
82 suggests that different objects or parts of a scene must be retrieved from a memory storage and are  
83 visualized using focal attention during imagery. This model is supported also by neuroimaging  
84 evidence suggesting that not only visual areas but also frontal and parietal areas associated with  
85 top-down processing are activated during imagery <sup>11</sup>. There is also evidence that occipital and  
86 temporal areas receive top-down inputs from frontal and parietal areas through long-range  
87 connections during imagery <sup>12</sup>. However, it is unknown whether top-down signals are specific to  
88 different imagery targets (e.g., faces versus places) or not. Functional connectivity patterns can be  
89 specific in strength, spatial destinations, or both. Watrous and colleagues <sup>13</sup> have shown that  
90 connectivity strength between temporal, parietal and frontal areas during visual perception is  
91 associated with better subsequent spatio-temporal memory retrieval. Moreover, Baldauf and  
92 Desimone <sup>14</sup> observed connectivity patterns having specific spatial destinations - from the inferior

93 frontal junction to either the fusiform face area or the parahippocampal place area - depending on  
94 whether participants were instructed to pay attention to faces or places during visual perception.  
95 Collectively, these studies suggest that top-down signals exerted through long-range connections  
96 may vary also depending on the content of visual imagery.

97  
98 Neural decoding is an excellent tool to address questions about content-specific representations <sup>15</sup>.  
99 It uses machine learning algorithms to read out different stimulus categories from brain signals.  
100 Content specific information has been successfully decoded during visual perception, for example,  
101 by deciphering single visual features (e.g., orientation, shape, color) but also more complex object  
102 information from recorded brain signals <sup>16, 17, 18</sup>. Similar approaches have been used to try to decode  
103 visual imagery, too. For instance, previous studies tried to decode different types of content specific  
104 information (e.g., perceptual, conceptual) during visual imagery from the sparse activation of  
105 various brain areas over time <sup>19, 20, 21</sup>.

106  
107 In this magnetoencephalography (MEG) study, we test the hypothesis that different imagery  
108 categories are associated with distinct functional connectivity patterns reflecting content-specific  
109 feature integration and top-down processing. Participants were asked to imagine two different types  
110 of targets: faces and places. In contrast to previous studies, we instructed the two imagery  
111 categories by using word cues only, rather than showing any concrete pictorial aids. The rationale  
112 was that - in the absence of any pictorial references - participants have to internally generate mental  
113 images purely based on memory and attentional control. Consequently, any differences between  
114 imagery categories would be fully attributable to an internally driven effort to (re-)instantiate  
115 mental images rather than being confounded with low-level visual information artificially  
116 introduced by a pictorial aid. We hypothesized that the imagery of faces and places involves distinct  
117 feature integration and top-down processes, associated with distinct connectivity patterns of  
118 different strength, spatial destination, or both. To test this hypothesis, we used neural decoding to  
119 read out imagined categories from the connectivity patterns measured across MEG sensors as well  
120 as the reconstructed cortical sources. To achieve that goal, we used a connectivity decoding method  
121 based on spatial covariance that was originally applied to motor imagery for brain computer  
122 interface (BCI) applications <sup>22</sup>. This decoding method was designed to capitalize on relative  
123 changes in brain activity measured from M/EEG sensor pairs. Here, we tested whether it will allow  
124 us to capture connectivity patterns distinguishing face versus place imagery, i.e. a type of internal  
125 signal that is notoriously hard to decode with classic time-domain decoders due to the temporal  
126 misalignment across trials. Moreover, in order to disentangle the contributions of feature  
127 integration and top-down processing, we test to what extent the decoding is driven by short-range  
128 and long-range connections.

129  
130  
131  
132  
133  
134  
135  
136  
137  
138

## 139 Results

140

### 141 *Decoding performance evaluation on simulated data*

142

143 To test our predictions we scanned participants using magnetoencephalography (MEG) while they  
 144 performed a visual imagery task. The task (Fig. 1A) consisted in the internal generation of a mental  
 145 image of either a face or a place, randomly intermixed and cued by a word cue on a trial-by-trial  
 146 basis. Participants were instructed to imagine a familiar instance of the cued category for several  
 147 seconds while keeping their eyes fixated at the center of the screen. At the end of each trial,  
 148 participants had to rate the vividness of their imagination and to confirm the imagined category of  
 149 the present trial.

150

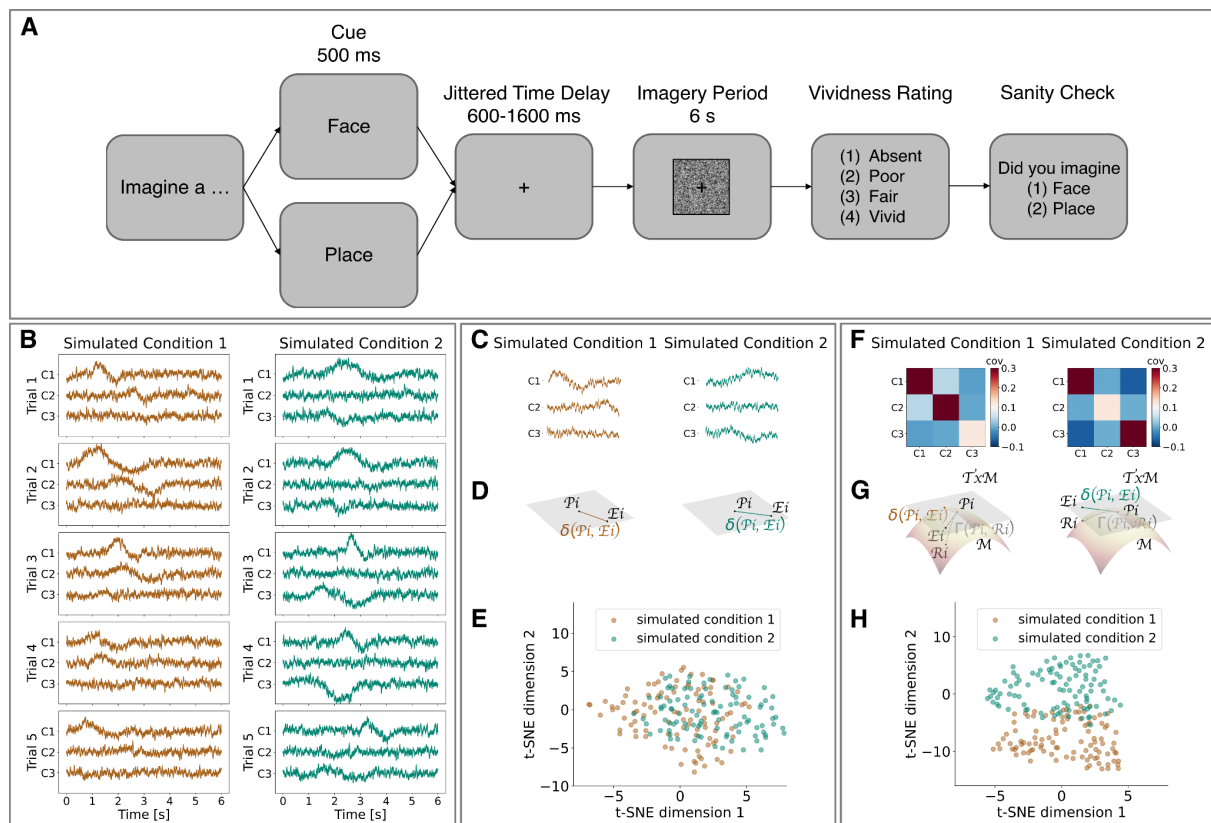

151

152

153 **Figure 1. Experimental procedure, decoding methods and simulated data.** The experimental  
 154 procedure (A) was structured as follows: each trial began with a visual word cue instructing one  
 155 category as the imagery target; then, a jittered time delay ensued after which the subject had to  
 156 imagine a familiar instance of the cued category while a dynamic phase-scrambled mask was  
 157 presented on the screen for 6s. At the end of each trial, participants were asked to rate the vividness  
 158 of their imagination and confirm the category they had imagined during the trial. In a computer  
 159 simulation (B-H) we tested whether relevant information is captured by covariance-based decoding  
 160 or classic time-domain decoding. For this purpose, we simulated time series belonging to two  
 161 different conditions (B) (here, we show only 5 representative trials in 3 simulated channels). Each  
 162 trial contained a signal simultaneously embedded in noise of different channels. However, the  
 163 onsets (and offsets) of the signal were misaligned across trials and across channels. To prepare  
 164 input data for time-domain decoding (C-E), we concatenated the time series of various channels  
 165 into one single vector for each simulated condition (C). The distance between an exemplar vector  
 166 ( $E_i$ ; i.e., single trial) and a prototype vector ( $P_i$ ; i.e., average across trials) for each simulated

167 condition can be estimated using an Euclidean metric ( $\delta$ ) (**D**). Dimensionality reduction (**E**) of all  
168 exemplar vectors - corresponding to all simulated trials - shows that simulated conditions are not  
169 linearly separable when using time-domain decoding. To prepare input data for covariance-based  
170 decoding (**F-H**) we estimated spatial covariance matrices for each condition (**F**), measuring the  
171 interdependence between channel pairs. The distance between an exemplar matrix ( $R_i$ ) and a  
172 prototype matrix ( $P_i$ ) on a Riemannian manifold ( $M$ ) can be estimated using a Riemannian metric  
173 ( $I$ ). Then, the covariance matrix can be projected to an Euclidean tangent space ( $T_xM$ ) obtaining a  
174 tangent vector (**G**). After that, the distance between an exemplar tangent vector ( $E_i$ ; single trial)  
175 and a prototype tangent vector ( $P_i$ ; average across trials) for each simulated condition can be  
176 estimated using an Euclidean metric ( $\delta$ ). Dimensionality reduction (**H**) of all tangent vectors -  
177 corresponding to all simulated trials - shows that simulated conditions are linearly separable when  
178 using covariance-based decoding.

179

180 First, we ran a simulation to investigate whether relevant information is captured by covariance-  
181 based decoding or classic time-domain decoding (see Fig.1B-H). There are major challenges  
182 associated with visual imagery signals - or, more in general, with any internally generated brain  
183 signal: On the one hand, information is temporally misaligned because there is a high variability in  
184 the onsets and offsets of imagination events across trials. On the other hand, information is  
185 presumably encoded in the reciprocal interconnections between channel pairs that give rise to  
186 specific spatial configurations. To account for these two aspects we simulated data as follows. We  
187 generated time series for one hundred trials in three different simulated channels. Each time series  
188 consisted of a combination of signal and noise. To account for temporal misalignment, we added  
189 random delays to signal onsets and offsets. To account for specific spatial configurations, we  
190 simulated data such that trials belonging to the first simulated condition had higher amplitude  
191 modulation in the first and the second channel while trials belonging to the second simulated  
192 condition had higher amplitude modulations in the first channel and the third channel (see Fig.1B).  
193 Then, we prepared input data for linear classification by using two different vectorization  
194 procedures. To prepare data for classic time-domain decoding, we concatenated time series  
195 corresponding to different channels into one single vector (Fig.1C). To prepare data for covariance-  
196 based decoding, we estimated a spatial covariance matrix measuring the interdependence between  
197 channel pairs, we estimated its position in a Riemannian manifold and we projected it on an  
198 Euclidean tangent space obtaining a tangent vector (Fig.1F-G). Finally, we used dimensionality  
199 reduction (t-distributed Stochastic Network Embedding, tSNE) to show that tangent vectors that  
200 are used as input for covariance-based decoding are linearly separable, while concatenated vectors  
201 that are used as input for classic time-domain decoding are not linearly separable (Fig.1E and H).  
202 Overall, this simulation revealed that the covariance-based decoding has a specific advantage in  
203 decoding temporally misaligned and reciprocally interconnected signals, like the ones driven by  
204 cognitive processes such as visual imagery.

205

### 206 *Decoding performance evaluation on MEG data*

207

208 Then, we used both the covariance-based decoding method and the classic time-domain decoding  
209 method to read out imagined categories from MEG signals. Both decoding methods included a  
210 single subject level and a group level statistical test. At the single subject level, we computed cross-  
211 validated Area Under the Receiver Operating Characteristic Curve (ROC AUC) scores using a  
212 sliding window approach. At the group level, we tested whether classification scores were

213 significant across subjects regardless of different amounts of trials used for classification. This  
214 second step is necessary because participants presented a different amount of trials after  
215 preprocessing (e.g., noise, eye movement, rating trial exclusion). In line with our expectations  
216 based on the simulations, the results obtained on empirical data show a stark difference in  
217 performance between the two decoding methods. Classic time-domain decoding did not perform  
218 significantly above chance level across subjects, in any time window (Fig.2A). In contrast,  
219 covariance-based decoding achieved correct classifications significantly above chance level  
220 ( $p < 0.05$ ,  $BF > 3$ ) across subjects, in three time windows spanning from 2.5 to 5.5 s (Fig.2B). To test  
221 whether these results were determined by the choice of the time window size we also tested shorter  
222 time windows. We obtained similar results when using 100 ms time windows for classic time-  
223 domain decoding and 500 ms time windows for covariance-based decoding (Fig.2C-D). This  
224 suggests that decoding performance is not strictly dependent on the time window size. Even though  
225 significant time windows are more sparse when using a shorter sliding window because the  
226 temporal misalignment problem is then more pronounced.

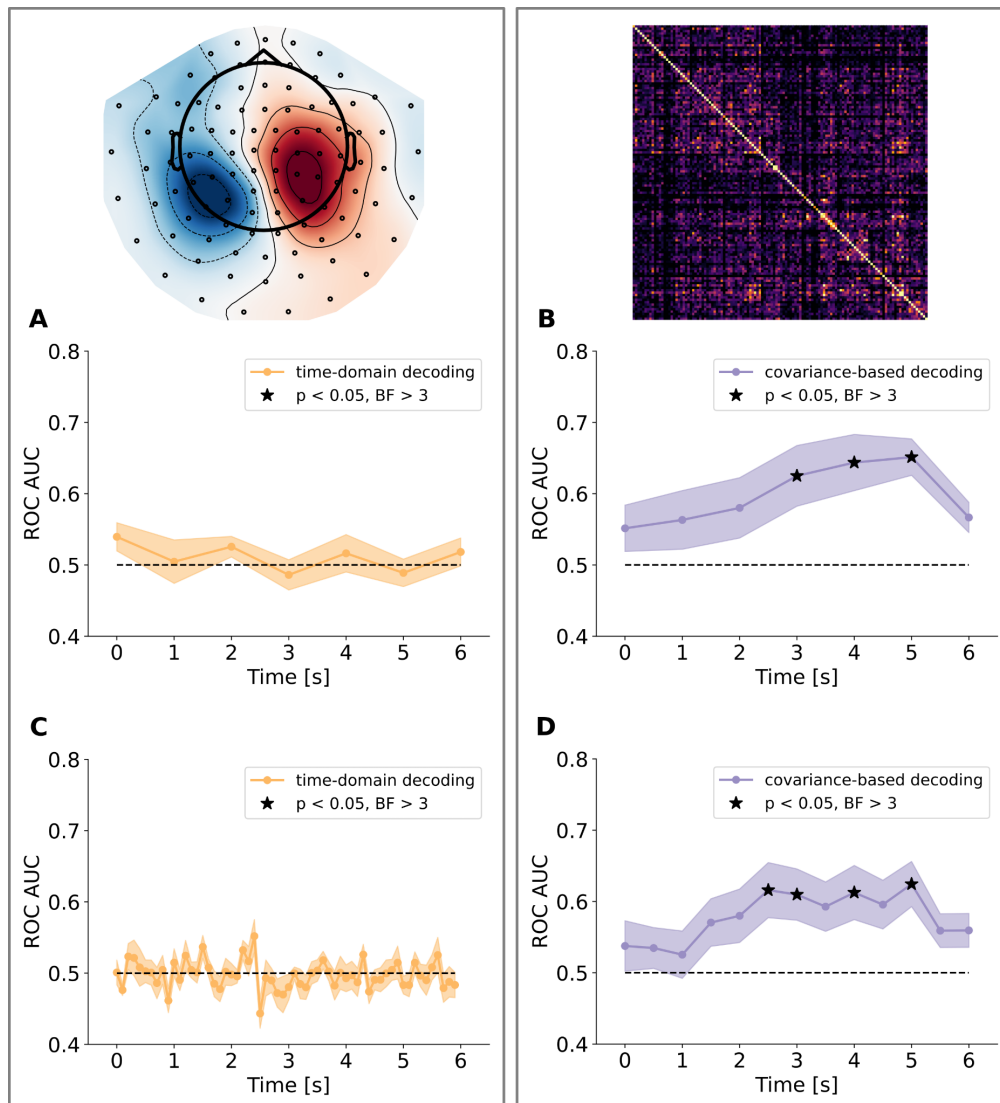

228  
229

230 **Figure 2. Time-domain decoding and covariance-based decoding applied to visual imagery**  
231 **MEG data.** Left panels (A and C) show group level decoding results obtained from the classic  
232 time-domain decoding method in sensor space (including gradiometers and magnetometers), using  
233 1 s (A) or 100 ms (C) sliding windows, respectively. Classification score is at chance level and not

234 statistically significant in any section of the trial epoch. Right panels (**B and D**) show Group level  
235 decoding results obtained from the covariance-based decoding method, using 1 s (**B**) and 500 ms  
236 (**D**) sliding windows, respectively. Classification score is above chance and statistically significant  
237 in three (or four) time windows spanning from 2.5 to 5.5 s. The solid line indicates the mean, while  
238 the shaded area indicates the standard error of the mean (s.e.m.).

239

### 240 *Relationship between decoding performance and vividness ratings*

241

242 Next, we tested whether covariance-based decoding performance correlated with participants'  
243 subjective evaluation of the vividness of visual imagery. We tested the relation between decoding  
244 performance and subjective ratings both across and within subjects (Fig.3). Across subjects,  
245 decoding performance (i.e., ROC AUC scores) correlated with self-reported individual differences  
246 in the general vividness of visual imagery ( $r=0.57$ ,  $p<0.05$ , Fig.4A), as assessed by the Vividness  
247 of Visual Imagery Questionnaire (VVIQ). Moreover, within subjects, we split the MEG dataset  
248 into trials associated with high vividness reports (scores  $\geq 3$  in the vividness rating provided at the  
249 end of the trial, see Fig.1A) and trials associated with low vividness reports (scores  $\leq 2$ ), to contrast  
250 the decoding performance associated with different subjective vividness ratings. We reasoned that  
251 if covariance-based decoding relies on information that contributes to the perceived vividness of  
252 visual imagery then high vividness ratings will be associated with higher ROC\_AUC scores.  
253 Indeed, decoding scores were higher and significant in the time windows from 2.5 to 5.5 s when  
254 using only trials with high vividness ratings ( $\geq 3$ , Fig.4B) while the decoding scores were lower  
255 and not significantly above chance level (at any time) when using only trials with low vividness  
256 ratings ( $\leq 2$ ). Importantly, there were no significant differences in vividness ratings between  
257 imagination categories (mean face rating = 2.94, mean place rating = 3.01,  $t = -0.48$ ,  $p = 0.63$ )  
258 suggesting that participants' imagination was equally vivid in faces and places trials.

259

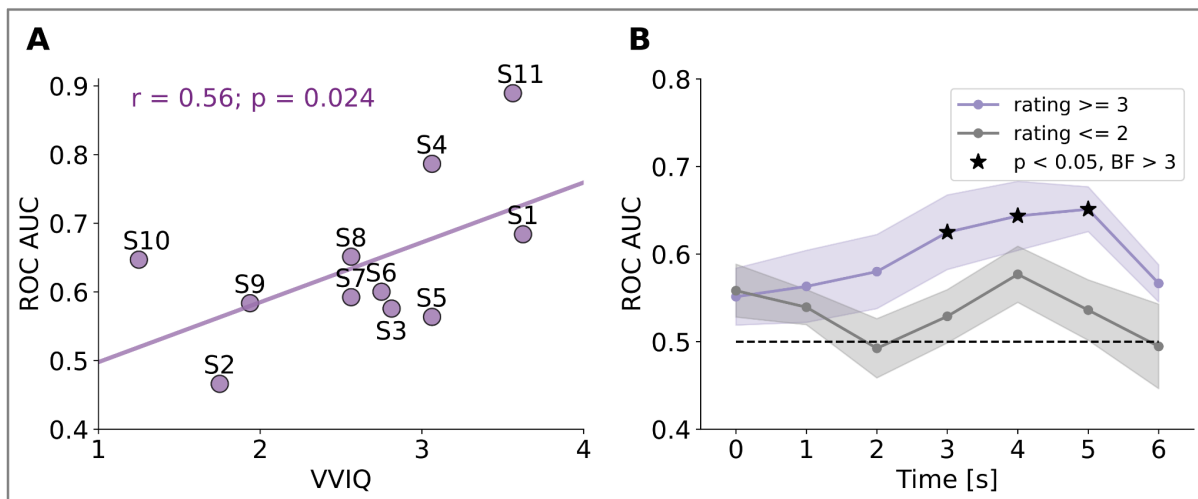

260

261

262 **Figure 3. Relation between covariance-based decoding performance and subjective vividness**  
263 **ratings. (A)** Correlation between vividness of visual imagery questionnaire (VVIQ) scores and  
264 ROC\_AUC scores obtained using covariance-based decoding. **(B)** We obtained higher and  
265 significant covariance-based decoding performance when using only trials associated with high  
266 vividness ratings ( $\geq 3$ , purple line), compared to lower and not significant covariance-based  
267 decoding performance when using only trials with lower vividness ratings ( $\leq 2$ , gray line). The  
268 solid line indicates the mean, while the shaded area indicates the standard error of the mean (s.e.m.).

269

270 *Detection and elimination of predictive saccades and microsaccades*

271

272 In addition, we ran a control analysis to rule out the possibility that the decoding was driven by  
273 systematic differences in eye movements associated with face and place imagery. This is a general  
274 concern for any neural decoding study, and the covariance-based decoding approach offers a  
275 straightforward and clean solution to rule out this potential confound. Although participants were  
276 instructed to keep their eyes fixated at the center of the screen during the imagination task, co-  
277 registered eye-tracking revealed some residual but systematic micro-saccadic activity that was  
278 related to the imagination targets (Fig.4A and B), even after excluding trials with supra-threshold  
279 eye-movements (saccades). Therefore, we used covariance-based decoding to read out imagination  
280 categories from eye-tracking data that survived the threshold-based exclusion. By visual inspection  
281 of eye-tracking data, we observed systematic differences in the eye movement position covariance  
282 that may contribute to the classification of face versus place imagery, at least partially for some  
283 participants in some time windows (Fig. 4A-B). At the group level, eye movement decoding was  
284 statistically significant ( $p < 0.05$ ,  $BF = 3$ ) from 3.5-4.5 s (Fig. 4C). In order to correct for that, we  
285 cleaned the MEG dataset from all trials containing any such predictive microsaccades, by training  
286 a linear classifier on the eye tracking dataset and estimating the predictive probabilities for each  
287 trial. All trials with increased classification probability were excluded from further analyses on the  
288 MEG dataset. After predictive microsaccade removal, eye tracking decoding was no longer  
289 significant (Fig.4D-F).

290

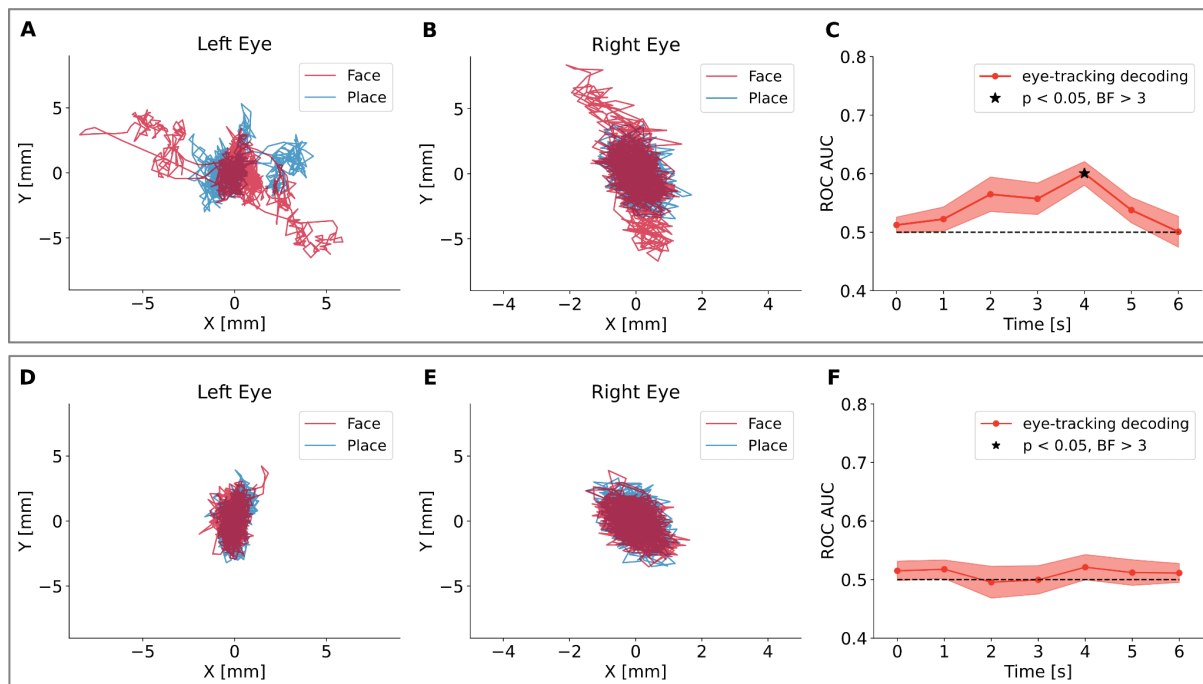

291

292

293 **Figure 4. Detection and removal of trials containing predictive microsaccades. (A, B)**

294 Examples of left and right eye movements in a trial in which the micro-saccade activity contained  
295 information about the imagination target (faces, red line, versus places, blue line). (C) Group-level  
296 decoding based on eye-tracking data only before microsaccade removal (mean and s.e.m). At this  
297 level, only trials containing overt saccades exceeding a rejection threshold were excluded. Trials  
298 containing sub-threshold, but predictive micro-saccade activation still contributed to the  
299 decodability of the imagination target. (D and F) After removing all trials with increased decoding



300 probabilities, only trials, in which eye-movement traces did not contain information about the  
301 imagination target, remained in the sample. **(F)** Resulting group-level decoding after microsaccade  
302 removal.

303

### 304 *The functional connectivity network distinguishing face vs. place imagery*

305

306 One major advantage of the covariance-based decoding approach for the purpose of this study is  
307 that it is inherently based on a functional connectivity measure, i.e. the degree of interaction  
308 between node pairs. This allows us to map the most informative connectivity patterns underlying  
309 covariance-based decoding. In the following, we use two different types of visualization: edge  
310 maps and hub maps (see Fig.5). While the edge map allows us to visualize what sensor pairs are  
311 more informative to distinguish face and place imagery, the hub map allows us to visualize what  
312 individual nodes are most informative to distinguish face and place imagery. Edge maps are based  
313 on the normalized absolute difference in covariance, averaged across trials. Hub maps are based  
314 on a cluster-based permutation test between covariance matrices collapsed along one dimension  
315 (we refer to this metric as *mstat*, i.e., matrix statistics, for details see Methods).

316 To allow for a better localization of these connectivity patterns we applied covariance-based  
317 decoding both in sensor space and in source space, which was reconstructed from the MEG  
318 recordings using Minimum Norm Estimates (MNE) in combination with 3D models of the  
319 subjects' individual brain anatomies (based on their MRI scans). The reconstructed sources were  
320 subsequently parcellated into cortical areas using an atlas. In sensor space, we obtained significant  
321 covariance-based decoding ( $p < 0.05$ ,  $BF > 3$ , Fig. 5A) from 2.5 to 5.5 s using all sensors (i.e., both  
322 gradiometers and magnetometers) also after removing trials with predictive microsaccades. The  
323 hub map estimated for this time window showed that most informative connectivity hubs  
324 distinguishing face and place trials are in the posterior sensors (Fig. 5D). The edge map estimated  
325 for this time window - including all connections within the highest 2 percentiles of normalized  
326 absolute differences in covariance - showed that the most informative connections include not only  
327 short-range connections within both anterior and posterior sensors but also long-range connections  
328 between anterior and posterior sensors (Fig.5C). In source space, we obtained significant  
329 covariance-based decoding ( $p < 0.05$ ,  $BF > 3$ , Fig. 5B) from 1.5 to 5.5 s using all parcellated sources  
330 also after removing trials with predictive microsaccades. The hub map estimated for this time  
331 window showed that the most informative connectivity hubs distinguishing face and place trials  
332 are in the occipital and parietal cortices but also in temporal and frontal regions, albeit weaker (Fig.  
333 5F). The edge map estimated for this time window - including all connections within the highest 2  
334 percentiles of normalized absolute differences in covariance - showed that the most informative  
335 connections include not only short-range connections within both occipital and parietal areas but  
336 also long-range connections between occipital, parietal, temporal and frontal areas (Fig. 5E).

337 Overall, these results suggest that imagined faces and places involve differences in functional  
338 connectivity spanning a broad network of brain areas including not only short-range connections  
339 within posterior and anterior areas but also long-range connections between posterior and anterior  
340 areas.

341

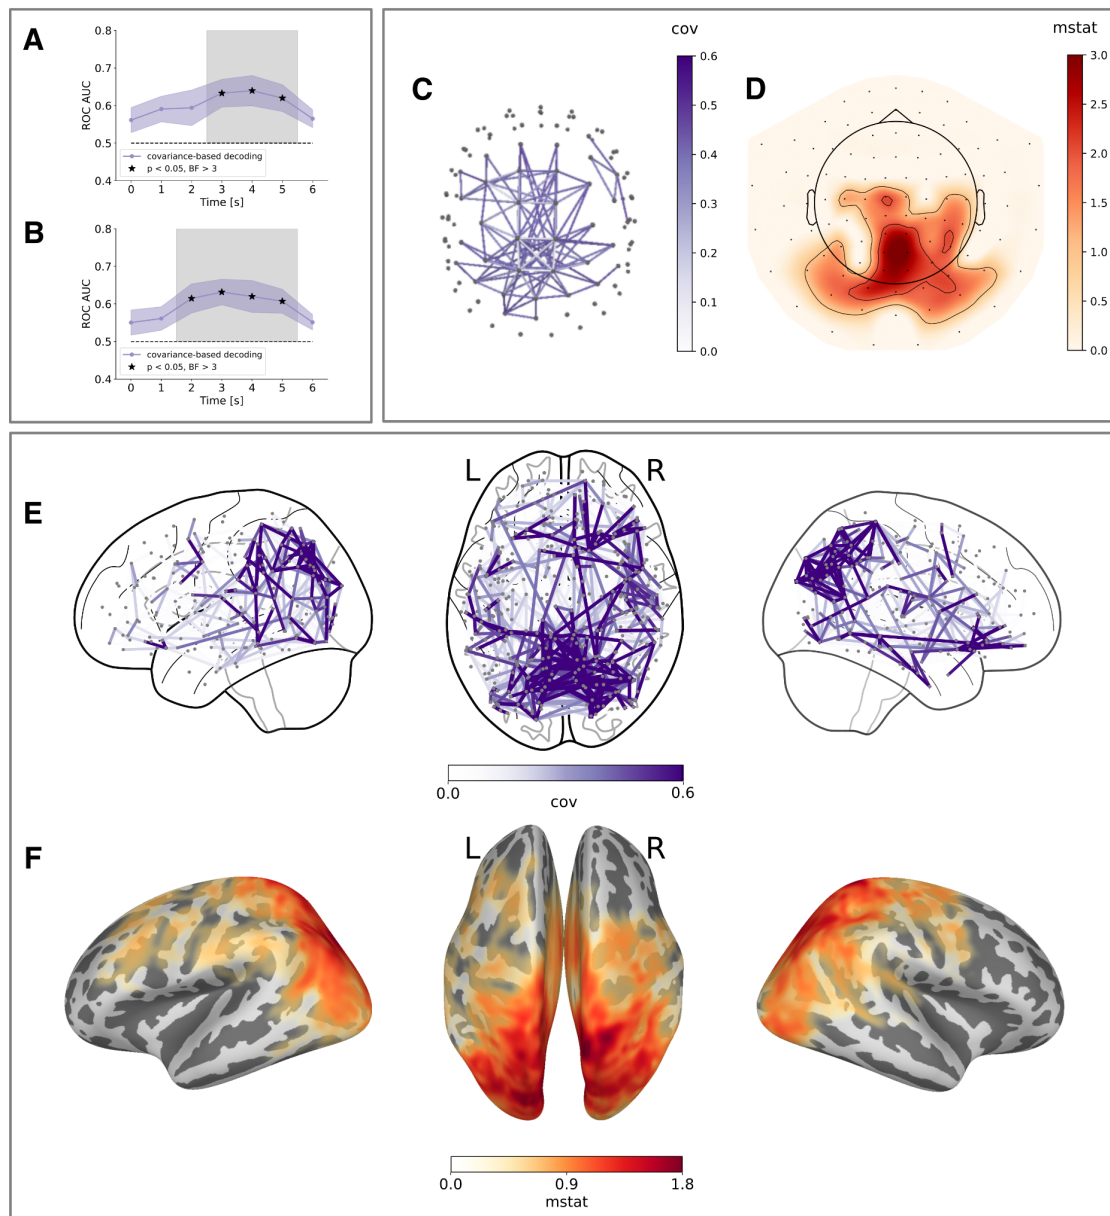

342  
343  
344  
345  
346  
347  
348  
349  
350  
351  
352  
353  
354  
355  
356  
357  
358  
359

**Figure 5. Whole-brain visualization of the connectivity patterns underlying covariance-based decoding in sensor and source space.** Decoding results obtained using all sensors (i.e., both gradiometers and magnetometers) (A) and all reconstructed sources parcellated using the Glasser atlas (B), after removing trials with predictive microsaccades. Edge maps represent the normalized absolute difference in covariance (purple color map). Hub maps represent the output of a cluster-based permutation test between face and place covariance matrices collapsed along one dimension (red color map). (C) Edge map showing the most informative connections between sensors distinguishing face and place trials (highest 2 percentiles). Each gray dot represents a sensor and each purple line represents the covariance between two sensors. (D) Hub map showing the most informative individual sensors distinguishing face and place trials. (E) Edge map showing most informative connections between parcellated areas distinguishing face and place trials (highest 2 percentiles). Each gray dot represents a parcellated area and each purple line represents the covariance between two parcellated areas. (F) Hub map showing most informative individual sources distinguishing face and place trials.

360 *Sub-networks contribution to overall decoding performance*

361

362 Finally, we tested the contribution from task-relevant sub-networks - including specific regions of  
363 interest (ROIs) - to covariance-based decoding. ROIs were selected based on previous literature  
364 and included: occipital areas (i.e., dorsal and ventral streams), parietal areas (i.e., inferior and  
365 superior parietal), temporal areas (i.e., inferior and medial temporal) and frontal areas (i.e., inferior  
366 frontal) (for a complete list see Methods). In particular, the aim of this sub-network analysis was  
367 to further disentangle the contribution of short-range and long-range connections to overall  
368 decoding performance. By restricting the decoding analysis to subsets of the covariance matrices,  
369 we tested the relative contributions of short-range connections (e.g, including distributed nodes  
370 within the visual areas) and long-range connections (e.g., including distributed nodes between  
371 parietal and visual areas, temporal and visual areas, frontal and visual areas). In this case, since we  
372 tested multiple sub-networks at the same time we performed multiple comparisons correction (see  
373 Methods). When testing the contribution of short-range connections (Fig. 6A), we obtained  
374 significant decoding results ( $p < 0.01$ ,  $BF > 8$ ) using connections within the visual areas (from 2.5 to  
375 5.5 s, light blue line) and within the parietal areas (from 2.5 to 3.5 s, light green line). Decoding  
376 within the temporal areas (purple line) and within the frontal areas (orange lines) was not  
377 significant. When testing the contribution of long-range connections (Fig. 6B), we obtained  
378 significant decoding results ( $p < 0.01$ ,  $BF > 8$ ) between parietal and visual areas (from 1.5 to 3.5 s,  
379 cyan line), between temporal and visual areas (from 1.5 to 3.5 s, yellow line), and between frontal  
380 and visual areas (from 3.5 to 5.5s, fuchsia line). Decoding between temporal and frontal areas was  
381 not significant. We also observed that the decoding was significant when using short-range  
382 connections within posterior cingulate areas and long-range connections between posterior  
383 cingulate and visual areas (see Fig. S1). This sub-network analysis revealed that both short-range  
384 and long-range connections are incremental to overall decoding performance.

385 To test how spatially specific these contributions from different sub-networks were, we ran a  
386 control analysis (Fig. S2) consisting in selecting task-irrelevant sub-networks that were little or not  
387 at all involved in the current visual imagery tasks, such as motor areas (i.e., premotor and motor)  
388 and auditory areas (i.e., primary and secondary auditory). We observed no significant decoding  
389 results for any of the short-range connections within these areas (Fig. S2 A) as well as the long-  
390 range connections between these areas (Fig. S2 B). This control analysis revealed that covariance-  
391 based decoding relies on spatially specific connectivity patterns associated with task-relevant sub-  
392 networks only.

393

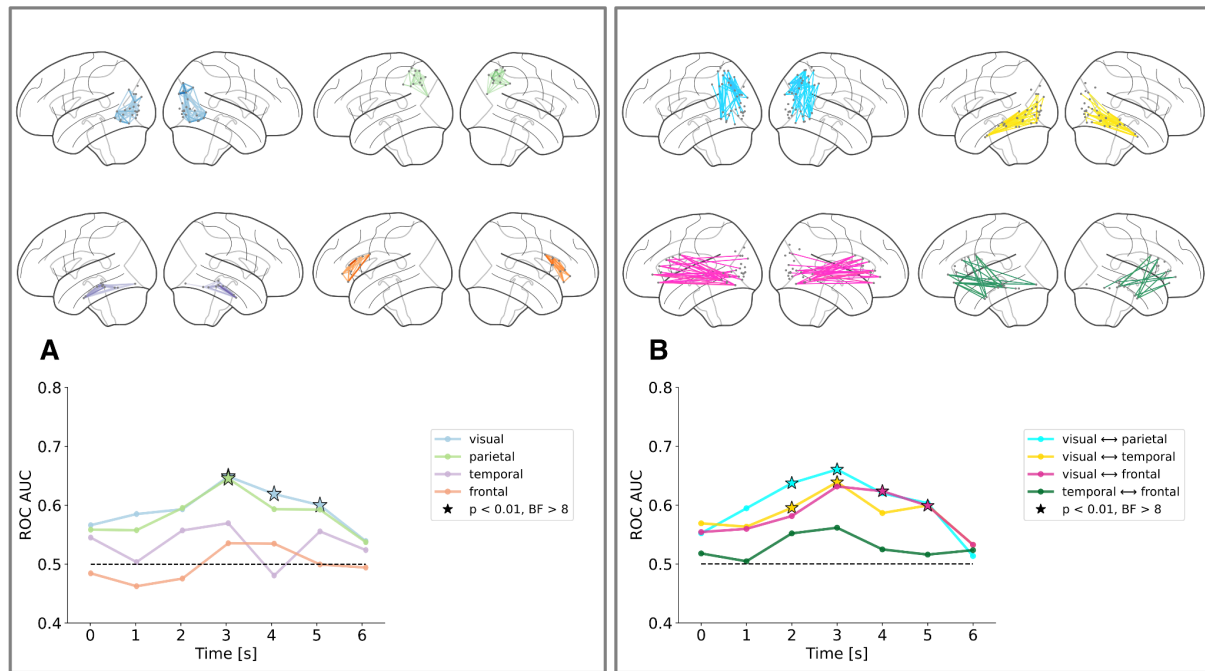

394

395

396

397

398

399

400

401

402

403

404

405

406

407

408

409

410

411

412

413

414

415

416

417

418

419

420

421

422

423

424

425

426

427

**Figure 6. Task-relevant sub-networks contribution to covariance-based decoding. (A-B)** Task-relevant sub-networks. **(A)** Decoding results obtained using short-range connections within visual (light blue line), parietal (light green line), temporal (purple line) and frontal (orange line) areas. **(B)** Decoding results obtained using long-range connections between visual and parietal areas (cyan line), between visual and temporal areas (yellow line), between visual and frontal areas (fuchsia line) and between temporal and frontal areas (dark green line). For each sub-network, representative connections are shown on a lateral brain view using the same color coding scheme.

## 428 Discussion

429

430 We investigated whether imagined faces and places are associated with distinct connectivity  
431 patterns reflecting content-specific feature integration and top-down processing. To do so, we used  
432 an experimental paradigm wherein vivid and detailed visual representations were generated  
433 internally, in the absence of any external stimulus. Such endogenous neural processes are  
434 challenging to decode due to their temporal misalignment across trials and because they involve  
435 the cooperation of different brain areas. To address these methodological and theoretical issues we  
436 introduced a covariance-based connectivity decoding method, originally designed for brain  
437 computer interface (BCI) applications. In particular, we used covariance-based decoding to read  
438 out endogenous functional connectivity changes associated with the mental imagery of faces and  
439 places. Our results demonstrate the potential and suitability of this decoding approach to answer  
440 key questions about the neural mechanisms underlying endogenous brain signals in visual imagery.

441

442 One novelty of this study is the use of a minimally constrained experimental paradigm. Previous  
443 imagery studies often used a retro-cue paradigm, in which a pictorial cue is displayed on the screen,  
444 and participants are instructed to internally recreate that exact mental image, usually in a short  
445 amount of time. This paradigm assumes that imagery is similar to visual working memory<sup>23</sup>,  
446 namely the internal replay and maintenance of a recently encountered image. Even though imagery  
447 events are better time-locked across trials when triggered by a pictorial cue, there are some  
448 methodological issues associated with the retro-cue paradigm. For instance, merely retrieving a  
449 recently presented visual stimulus is more constrained and arguably easier as it induces low-level  
450 visual features which a decoder can rely on. In contrast, we conceived of mental imagery as a  
451 constructive process based on the internal generation of images<sup>24</sup> as opposed to a reproductive  
452 process based on a replay of recently seen images. Therefore, we did not use any pictorial aid as  
453 external reference but word cues only. To preclude the possibility that our decoder could rely on  
454 visual signals evoked by visual word cue presentation, the cueing period was separated in time  
455 from the subsequent imagination period by a jittered interval of about one second, and furthermore  
456 any remaining afterimages were eliminated by a dynamic phase scrambled mask. Moreover, we  
457 provided participants with a long imagery time window (6 s), assuming that truly internally re-  
458 constructing an image requires time. All these design choices were made to emphasize the  
459 internally generated aspects and to minimize potential stimulus-driven aspects. However, the costs  
460 of these experimental choices are high in terms of the methodological challenges thereby  
461 introduced. In particular, the temporal misalignment of endogenous signals across trials often  
462 renders classic time-domain decoding largely ineffective.

463

464 We demonstrate a novel methodological approach that can effectively read out purely endogenous  
465 signals which, until now, have been challenging to decode from electrophysiological data. Previous  
466 studies have investigated the temporal dynamics of visual imagery using time-domain decoding  
467 methods that were optimally tuned to decode fast transient changes in brain activity driven by  
468 external stimuli<sup>19</sup>. However, since classic time-domain decoding methods are dramatically  
469 impeded by temporal misalignment across trials in mental imagery paradigms, it is necessary to  
470 identify methodological solutions. For example, probabilistic decoding models based on latent state  
471 dynamics (e.g., Hidden Markov Models) have recently been proposed to deal with the  
472 misalignment problem<sup>25</sup>. The covariance-based decoding approach that we used here is an  
473 alternative option to decode temporally misaligned signals. Our simulations showed that temporal

474 misalignment prevents classic time–domain decoding, whereas the covariance–based decoding  
475 approach is less susceptible to this challenge and achieves reliable classification across trials.  
476 Another important advantage of the covariance-based decoding method is its focus on functional  
477 connectivity. Recent fMRI studies using MVPA decoding have shown that imagined categories  
478 can be decoded from the sparse co-activation of frontal, parietal and occipital areas <sup>26</sup>. This was an  
479 important step to understand the variety of cognitive processes underlying visual imagery.  
480 However, communication across brain areas was not taken into account in this prior work. In  
481 contrast, spatial covariance relies on the reciprocal interconnections between brain regions.  
482 Decoding methods based on spatial covariance, such as Common Spatial Filter (CSP) <sup>27</sup>, have been  
483 used to decode motor commands from electrophysiological signals for brain computer interface  
484 (BCI) applications. This method relies on spatial filters to decode motor commands involving  
485 different motor effectors (e.g., left-hand vs. right-hand <sup>28</sup>). Here, we used an improved version of  
486 the CSP method that capitalizes on the geometric properties of spatial covariance matrices.  
487 Importantly, we extend the covariance-based decoding approach to generate both sensor space and  
488 source space visualizations of the most informative connectivity patterns, which allows for a  
489 meaningful interpretation of contributing hubs and edges all over the cortical fold. In other words,  
490 since the signal our decoder is based on directly reflects fluctuations in functional connectivity, we  
491 can now pinpoint which functional connections contribute information to solve the cognitive task  
492 at hand. The study of functional connectivity networks provides an optimal theoretical framework  
493 to answer critical neuroscience questions that are relational in nature <sup>29, 30</sup>. Measures of statistical  
494 interdependence (e.g., correlation) have been previously used to investigate large-scale network  
495 dynamics during cognitive tasks. For instance, previous studies successfully decoded different  
496 internally driven cognitive states (e.g., free recall, mathematical calculation) from whole-brain  
497 connectivity using fMRI <sup>31</sup>.

498 In general, the covariance-based decoding method has many advantages including simplicity,  
499 interpretability and computational parsimony. The method is mathematically simple because it  
500 doesn't require specific assumptions about frequency and phase, unlike other connectivity  
501 measures (e.g., coherence). It is interpretable because it provides information about the  
502 connectivity patterns that allows to discriminate between two classes. Information about reciprocal  
503 interconnections is also indirectly captured by more complex decoding methods, for instance neural  
504 networks. However, neural networks require parameter tuning that is often difficult to interpret.  
505 There are also specific types of neural networks models that were specifically designed to capture  
506 information encoded in connectivity patterns (i.e., graph neural networks <sup>32</sup>). However, this  
507 network architecture requires a large number of trials which is often prohibitive for neuroscience  
508 experiments. In contrast, covariance-based decoding is computationally parsimonious because it  
509 requires a smaller number of trials; for instance, here we used 240 trials per participant or less after  
510 preprocessing. One limitation is that covariance estimation requires many timepoints to be  
511 sufficiently accurate. We obtained significant decoding results using a sliding window of as few as  
512 500 ms. MEG temporal resolution is better than fMRI where covariance estimation would require  
513 minutes of task-based recording, which is hardly feasible. However, even covariance-based  
514 decoding from MEG might not be enough to decode faster cognitive processes.

515

516 To test the validity of the covariance-based decoding method for cognitive neuroscience  
517 applications, we performed a series of control analyses to ensure that decoding performance was  
518 related to the imagery task and was not driven by potential confounds (e.g. eye movements). A  
519 potential confound for every neural decoding study involving a visual task is that classification

520 might be (at least partially) driven by eye movements. There is evidence for the fact that visual  
521 imagery, too, may be accompanied by oculomotor activation. For instance, when participants are  
522 instructed to imagine a recently seen grid pattern while looking at a blank screen, they produce  
523 oculomotor patterns which resemble the oculomotor patterns observed during perception of the  
524 actual grid pattern<sup>33</sup>. Systematic differences in eye movements associated with different imagery  
525 categories may affect neural decoding. Previous studies investigating visual perception, visual  
526 imagery and visual working memory used co-registered eye-tracking data to rule out potential eye  
527 movements confounds<sup>19,34</sup>. In contrast, when eye movements are not controlled, there is evidence  
528 that they can partially explain neural decoding performance<sup>35</sup>. The effect of eye movements on  
529 neural decoding performance can be explained by the overlap of their underlying neural generators  
530 with visual processing. For instance, there is evidence for an extensive overlap between brain areas  
531 activated by peripheral oculomotor activity and visual attention<sup>36</sup>. In order to rule out potential eye  
532 movements confounds, we ran a control analysis using co-registered eye-tracking data. We first  
533 detected all trials associated with a high predictive probability based on the eye tracking data and  
534 then we removed all these trials with predictive eye movements from the MEG dataset. This control  
535 analysis is also important for the interpretation of the most informative connectivity patterns  
536 associated with covariance-based decoding since it ensures that these connections cannot be  
537 explained by systematic differences in eye movements.

538 Another important step was to show that classification accuracy correlates with participants'  
539 performance in the imagery task. Since there was no direct behavioral measure to assess whether  
540 participants performed well or not, we collected subjective vividness ratings for each trial. We  
541 expected to obtain better decoding results for those trials in which participants reported having a  
542 highly vivid mental image. In line with this conjecture, we observed that higher vividness ratings  
543 were associated with higher decoding performance. Moreover, we assessed how well participants  
544 considered themselves able to internally generate vivid images in their mind's eye using the VVIQ.  
545 There is evidence for the fact that there are important individual differences in visual imagery<sup>37</sup>,  
546<sup>38</sup>. In particular, the ability to generate mental images ranges from poorly vivid, almost absent  
547 imagery (i.e., aphantasia) to highly vivid, almost realistic imagery (hyperphantasia). We expected  
548 to obtain better decoding results for participants who considered themselves able to internally  
549 generate vivid mental images. In line with this prediction, we observed a significant positive  
550 correlation between decoding performance and VVIQ scores (Fig. 3).

551  
552 Our results have theoretical implications that advance an understanding of the neural mechanisms  
553 underlying visual imagery. We asked whether information integration is involved during visual  
554 imagery in a way that is similar to visual perception, regardless of whether an external stimulus is  
555 presented or not. Since faces and places involve different visual features and different neural  
556 generators, we hypothesized that imagining these two different categories will be associated with  
557 distinct functional connectivity patterns. In particular, we expected that short-range connections  
558 within dorsal and ventral streams - including different brain areas representing specific visual  
559 features - will be associated with feature integration during visual imagery. In line with our  
560 predictions, we obtained significant decoding results when using short-range connections within  
561 visual areas. Our results are consistent with previous studies suggesting that face and scene  
562 perception are associated with distinct brain networks<sup>39,40</sup>. Indeed, our sub-network analysis  
563 included brain areas that are considered to be part of both the face perception network (e.g., the  
564 fusiform or occipital face areas) and the scene perception network (e.g., the parahippocampal place  
565 area, the retrosplenial cortex, or the occipital place area). We also obtained significant decoding

566 results when using short-range connections within parietal areas. Previous studies have shown that  
567 parietal areas are involved in feature integration during visual perception <sup>41</sup>. There is also evidence  
568 from patients with parietal lesions who experience the clinical condition ‘hemispatial neglect’ that  
569 is associated with the incapability to visualize a visual hemifield both during perception and  
570 imagery <sup>42</sup>. In line with this literature, we interpret content-specific short-range connections within  
571 the parietal areas as reflecting manipulation of spatial information that is necessary to achieve  
572 feature integration. These findings, taken together, suggest that information integration does not  
573 necessarily require constant monitoring of an external stimulus. In contrast, content-specific  
574 coordination between different brain areas associated with feature integration is a basic  
575 computation deeply rooted in the nervous system that can be deployed even in the absence of an  
576 external stimulus.

577 A second question we sought to answer was whether top-down processing exerted from cognitive  
578 control mechanisms can be specific for different imagination categories. Previous studies have  
579 shown local activation during visual imagery in temporal areas associated with memory retrieval  
580 <sup>43, 44</sup>, in parietal areas associated with visuospatial attention <sup>45, 46</sup>, and in frontal areas associated  
581 with focal attention <sup>11, 47</sup>. These control areas do not only work individually but rather they  
582 coordinate with each other in broad networks (e.g., default mode network <sup>48</sup> and multiple-demand  
583 network <sup>49</sup>) during cognitive tasks such as memory recall, daydreaming and attentional control.  
584 Moreover, there is evidence that, according to the global workspace theory <sup>50</sup>, control areas  
585 constantly exchange information with sensory areas during effortful cognitive tasks <sup>51</sup>. In line with  
586 this view, we expected long-range connections between temporal and visual areas, parietal and  
587 visual areas, frontal and visual areas to be associated with top-down processing during imagery.  
588 However, it was still unclear whether the contributions from control areas depend on the precise  
589 content of imagery or not. We tested whether information contained in long-range connections can  
590 be used to distinguish the imagined categories (e.g, face versus place). It is important to point out  
591 that we cannot tell apart top-down and bottom-up information flow associated with long-range  
592 connections because covariance is a bi-directional functional connectivity measure. Nevertheless,  
593 there is evidence suggesting that information is flowing predominantly top-down during imagery  
594 and bottom-up during perception <sup>52, 53</sup>. Our results suggest that long-range connections between  
595 temporal and visual areas, parietal and visual areas, as well as frontal and visual areas contain  
596 specific information that is captured by covariance-based decoding to distinguish face and place  
597 imagery. The specificity of these long-range connections suggests that cognitive control  
598 mechanisms do not provide generalized support to visual cortex but rather content-specific  
599 information that is tailored to imagined categories (i.e., imagery/attentional templates, see <sup>14</sup>).

600  
601 The theoretical and methodological implications of this study extend well-beyond visual imagery.  
602 Mental imagery is one example of a purely internally driven cognitive process but there are many  
603 others: for instance, endogenous visual attention and visual working memory. All such internally  
604 driven cognitive processes are not time-locked to an external stimulus and the endogenous brain  
605 activity associated with them is hard to detect because there is no overt behavior. Moreover,  
606 internally driven cognitive processes are typically associated with reciprocal interconnections  
607 between control areas and perceptual areas. We showed the suitability of the covariance-based  
608 decoding approach to answer questions about visual imagery. In addition, we suggest that the same  
609 method would be appropriate to also answer research questions about visual attention and visual  
610 working memory. Our findings also have implications for visual prediction. Indeed, endogenous  
611 signals involving reciprocal interconnections across multiple areas play an important role in visual



612 prediction, as suggested by analysis-by-synthesis<sup>54</sup> and predictive coding<sup>55</sup> theories. For instance,  
613 there is evidence from psychophysics that cueing upcoming images with visual and auditory word  
614 cues enhances subsequent visual detection<sup>56</sup>. However, it is difficult to detect endogenous signals  
615 associated with visual prediction. We suggest that the covariance-based decoding approach also  
616 offers promising applications in that direction.

617

618 Taken together, we showed that imagined faces and places can be decoded from MEG signals using  
619 spatial covariance as a measure of functional connectivity. This finding has two implications for  
620 the understanding of visual imagery. On the one hand, we show that feature integration in the visual  
621 cortex also occurs when there is no external stimulus, and that it is specific to imagery categories.  
622 On the other hand, we show that reciprocal interconnections between cognitive control areas and  
623 perceptual areas are content-specific, i.e., different for imagined faces and places. To arrive at these  
624 conclusions, we used a minimally constrained experimental design that was structured to  
625 emphasize the internal generation of mental images. We proposed the application of a covariance-  
626 based decoding method originally designed for brain computer interface (BCI) to answer this  
627 cognitive neuroscience question. We suggest that our successful application of covariance-based  
628 decoding to endogenous signals associated with visual imagery paves the way for future  
629 applications to other internally driven cognitive processes, such as visual attention, visual working  
630 memory, and visual prediction.

631

632

633

634

635

636

637

638

639

640

641

642

643

644

645

646

647

648

649

650

651

652

653

654

655

656

657

## 658 **Materials and Methods**

659

### 660 *Participants*

661

662 Eleven healthy participants (mean age = 28.45, range 24-33, 4 female) with no history of  
663 psychiatric or neurological disorders took part in this MEG experiment. All of them reported  
664 normal or corrected-to-normal vision. Participants signed an informed consent form before the  
665 recording session. Ethical approval to conduct the study was provided by the University of Trento  
666 ethical committee.

667

### 668 *Vividness of Visual Imagery Questionnaire*

669

670 The Vividness of Visual Imagery Questionnaire (VVIQ) is a psychometric test that has been  
671 designed to measure individual differences in the vividness of visual imagery<sup>57</sup>. The VVIQ  
672 consists of 16 experimental items organized into four groups. For each group, participants are  
673 instructed to imagine a scenario like a familiar person, a familiar shop, or a natural landscape. For  
674 each item, participants provide vividness ratings reflecting the visual resolution that they can  
675 achieve when they imagine specific details for each scenario (e.g., face contour, characteristic  
676 poses, clothes color). Vividness ratings range on a scale from 1 (poor imagination) to 5 (vivid  
677 imagination).

678 Before taking part in the MEG experiment, we asked participants to complete the VVIQ online on  
679 an open-source survey platform (LimeSurvey, GmbH, Hamburg, Germany).

680

### 681 *Experimental Procedure*

682

683 We used the Psychophysics Toolbox<sup>58</sup> (PTB-3), MATLAB release R2017b, for stimulus  
684 generation and stimulus delivery. The stimuli were projected on a translucent whiteboard using a  
685 DLP LED projector (ProPixx, VPixx Technologies Inc., Saint-Bruno, Canada) at a 120 Hz refresh  
686 rate. The whiteboard was located at 1 m distance from the participant and it provided a projection  
687 area of 51x38 cm (width x height) and 1440x1080 pixel resolution.

688 The experimental paradigm is shown in Figure 1A. Each trial began with an instruction screen  
689 (“Imagine a...”). Then, participants were presented with a visual word cue (“Face” or “Place”)  
690 instructing a category for imagination. After that, a fixation cross was shown in the middle of the  
691 screen and there was a 600-1600 ms jittered time delay. At this point, the trial epoch started and  
692 lasted for 6 seconds. A 15x25 cm picture frame containing a dynamic phase-scrambled mask  
693 centered around the fixation cross was displayed on the screen. The picture frame was meant to  
694 constrain participants’ imagination to a constant portion of the screen such that the size of the  
695 imagined object was consistent across trials and across imagery conditions. Participants were  
696 instructed to fill the picture frame with their visual imagination. In particular, they were asked to  
697 imagine a familiar face or place of their choosing. Even though participants were allowed to choose  
698 the object of their imagination, they were instructed to always imagine the same face and the same  
699 place throughout the experiment in order to reduce within-subject variability. Following the trial  
700 epoch, participants were asked to rate the vividness of their imagination on a scale from 1 (poor  
701 imagination) to 4 (vivid imagination). Finally, we presented participants with a catch question (i.e.,  
702 “Did you imagine a face or a place?”) in order to make sure they were following the instructions.  
703 We used an MEG-compatible response collection system (ResponsePixx Dual Handheld, VPixx

704 Technologies Inc., Saint-Bruno, Canada) to keep track of participants' responses. Before starting  
705 the experiment, participants performed 10 practice trials in order to familiarize themselves with the  
706 task. The experiment consisted of 240 trials evenly distributed over 4 blocks. The presentation  
707 order of the instructed categories was randomized.

708

### 709 *Data Acquisition*

710

711 Prior to data acquisition, individual head shapes were digitized with a Polhemus Fastrak digitizer  
712 (Polhemus, Vermont, USA), including fiducial landmarks (nasion, right and left pre-auricular  
713 points) and about 200 additional points spread out all over the scalp. Five Head Position Indicator  
714 (HPI) coils were placed on participant's mastoid bones and forehead to keep track of participant's  
715 head position inside the dewar through electromagnetic induction before and after each recording  
716 block. Landmarks and HPI coils were digitized twice in order to ensure that their spatial accuracy  
717 was less than 1mm.

718 MEG recordings were obtained in a magnetically shielded room (AK3B, Vacuum Schmelze,  
719 Hanau, Germany) using a 306-channel (204 first order planar gradiometers, 102 magnetometers)  
720 VectorView MEG system (Neuromag, Elekta Inc., Helsinki, Finland). The MEG signal was  
721 sampled at 1 kHz, with a low-pass anti-aliasing filter at 330 Hz and a high-pass filter at 0.1 Hz.  
722 Before entering the experiment room, we ensured that participants were not wearing or carrying  
723 any metallic object and other potential sources of electromagnetic interference. Participants  
724 performed the task in a seated position. When positioning participants in the MEG scanner, we  
725 ensured tight contact with the dewar. Participants were instructed to avoid head, body and limb  
726 movements during the trial epoch.

727 Moreover, participants were instructed to avoid eye blinks and keep strict eye fixation as much as  
728 possible during the trial epoch. Binocular pupil size and eyes' position were continuously  
729 monitored by an MEG-compatible eye-tracking device (Eyelink 1000 Plus, SR-Research Ltd.  
730 Mississauga, Ontario, Canada). In the beginning of each experimental session, participants  
731 performed an eye-tracking calibration task aimed at verifying the correspondence between pupil  
732 position in the image recorded from the camera and gaze position on the screen. Calibration was  
733 repeated if drift was noticed in the course of the experimental session.

734

### 735 *Eye-Tracking Analysis*

736

737 To rule out potential confounds, we removed all trials in which we measured oculomotor noise. In  
738 particular, we identified three types of oculomotor noise associated with potential confounds at the  
739 brain level: eye blinks, saccades. Eye blinks consist in the rapid opening and closure of the eyelids.  
740 Saccades are fast, voluntary eye movements whose amplitude can be up to 15-20 degrees.

741 We used co-registered eye-tracking data to exclude trials contaminated by oculomotor noise. The  
742 eye-tracker measured left and right pupil size (i.e., pupillometry) as well as left and right, horizontal  
743 (x) and vertical (y) gaze coordinates. Thus, the eye-tracking output consisted of 6 channels. The  
744 analog output was in voltage (-5V to +5V range). The raw eye-tracking signal was sampled at 1  
745 kHz. We segmented eye-tracking data around the trial epoch (0-6 sec). Moreover, we downsampled  
746 the raw signal to 250 Hz and applied a notch filter to remove 50 Hz power-line noise. Then, we  
747 converted the analog output (in voltage) to digital units (pixels) and we used the physical  
748 specificities of the eye tracking device (i.e., data range, voltage range, screen proportion, screen

749 distance) to convert pixels to millimeters. Binocular pupil size was measured in  $\text{mm}^2$ . Vertical and  
750 horizontal (x, y) binocular gaze coordinates were measured in mm.

751 For eye blink detection, we used an automatic artifact rejection method based on a pupil size  
752 threshold. During blinks the eye-tracking device loses track of the pupil, resulting in missing values  
753 in the output file. However, eye blinks are preceded and followed by a sharp decrease in pupil size  
754 measurements, because the closure and opening of the eyelids is not instantaneous. For each  
755 subject, we computed the absolute value and z-normalized (mean subtracted and divided by  
756 standard deviation) pupil area measured from left and right eye. We defined 3 standard deviations  
757 from the mean as a threshold for eye blink detection. Trials in which pupil size measurements  
758 exceeded the threshold were excluded from further analysis.

759 For saccade detection, we used an automatic artifact rejection method based on a velocity-threshold  
760 identification (VT-I) algorithm<sup>59</sup>. This algorithm separates fixations and saccades based on their  
761 point-to-point velocities using binocular x, y gaze coordinates. We computed the tangent of the  
762 rotation angle of the eye relative to the head and we used that measure to calculate eye movement  
763 velocities (degrees/second). Velocity profiles typically show two distributions: low velocities for  
764 fixations (i.e., <100 deg/sec), and high velocities for saccades (i.e., >300 deg/sec). Trials exceeding  
765 the high velocity threshold (i.e., >300 deg/sec) were excluded from further analysis.

766 Moreover, we tested whether even after we applied the velocity-threshold there were trials  
767 containing subthreshold eye movements (i.e., microsaccades) which were highly predictive for one  
768 of the imagination categories. Microsaccades are short-range, involuntary eye movements whose  
769 amplitude varies from 2 to 120 arcminutes (1 arcminute = 1/60 of one degree). For predictive  
770 microsaccade detection, we ran the covariance-based decoding pipeline (see below) on sub-  
771 threshold (<300 deg/sec) binocular x, y gaze coordinates. For each trial and each subject, we  
772 estimated predictive probabilities for the two imagination categories and we removed all trials with  
773 predictive probabilities exceeding a certain threshold. We did not use a fixed probability threshold  
774 for every participant, instead we adjusted the probability threshold for each participant (range 65-  
775 90%) depending on the average difference in covariance between face and place trials. Trials  
776 containing predictive microsaccades in the eye-tracking dataset were excluded from further  
777 analysis in the MEG dataset. Finally, we ran the covariance-based decoding pipeline again to test  
778 whether predictive microsaccade detection was working properly. To avoid overfitting due to  
779 selection bias we used nested cross validation. We divided the eye-tracking dataset in training and  
780 test set. We detected trials with predictive microsaccades using the training set and we removed  
781 predictive trials from the test set. Then, we divided the portion of data that we previously used as  
782 a test set in training and test sets again. We trained the decoding model using the training set and  
783 we tested it using the test set. When trials containing microsaccades with high predictive  
784 probabilities were removed for each subject, classification scores were at chance level in every  
785 time window at the group level (Fig. 4F).

786  
787 *MEG pre-processing*

788  
789 MEG pre-processing was performed using MNE-Python<sup>60</sup> (v0.18.1), Python release 3.6.7,  
790 combined with custom routines. First, we removed external and internal sources of noise from the  
791 MEG signal. Then, we performed basic signal processing operations like filtering and epoching.  
792 External noise (e.g., environmental noise, stationary noise) was removed from MEG recordings  
793 offline using a MaxFilter software<sup>61</sup> (tsss-filters). In particular, we used a temporally non-extended  
794 spatial Signal Source Separation (SSS) algorithm in order to suppress external sources of magnetic

795 interference. Whenever head movements exceed 1 cm within or between blocks, we used the  
796 MaxMove algorithm to spatially co-register MEG recordings across blocks to the median head  
797 position. HPI movement correction was applied to MEG data collected from 6 over 11 subjects.  
798 Then, continuous data was visually inspected for system related artifacts (e.g., SQUID jumps), and  
799 contaminated sensors were interpolated. Up to 10 sensors per experimental block were interpolated.  
800 Internal noise was reduced using independent component analysis<sup>62</sup> (ICA) while preserving  
801 signals originating from the brain. Among the potential sources of internal noise there are heartbeat,  
802 muscular activity and any residual oculomotor activity (e.g., eye blinks, eye movements) that was  
803 not removed based on the eye-tracking data. We used a fixed-point algorithm to estimate 15  
804 independent components in the trial epoch time window (0-6 sec). Up to 5 components per block  
805 were excluded based on visual inspection of spatial topographies and latent sources' time course.  
806 A two-pass zero-phase infinite impulse response (IIR) band-pass filter was applied to raw data  
807 between 1 and 150 Hz. This IIR filter was based on a Butterworth forward-backward filter. Time  
808 series were downsampled to 250 Hz in order to reduce memory load and speed up algebraic  
809 operations (e.g., matrix multiplication). Then, we segmented trial epochs from picture frame onset  
810 to picture frame offset (0-6 seconds). We further segmented the trial epoch using different time-  
811 window segmentation schemas. In particular, we used a short segmentation scheme (100 ms time-  
812 windows), an intermediate segmentation scheme (500 ms time-windows) and a long segmentation  
813 scheme (1 sec time-windows).

814

#### 815 *Trial Exclusion*

816

817 Trials were excluded from further analyses according to different criteria. We excluded all trials in  
818 which the vividness rating was poor ( $\leq 2$ ) or participants provided a wrong answer to the catch  
819 question about which category they had just imagined. In both cases, the entire trial epoch was  
820 discarded. Moreover, we excluded all trials containing oculomotor noise (eye blinks, saccades,  
821 predictive microsaccades). In this case, we discarded only noisy time-windows rather than the  
822 entire trial epoch. Importantly, the remaining number of trials for each time window was not  
823 systematically different between experimental conditions (face vs. place) after trial exclusion.

824

#### 825 *Covariance Estimation*

826

827 We used the pyRiemann toolbox for covariance estimation. We estimated covariance as a measure  
828 of joint variability between a pair of time series using Equation 1:

829

$$830 \quad cov(x^i, x^j) = \frac{1}{N} \sum_{t=1}^{N_t} (x_t^i - \bar{x}^i) (x_t^j - \bar{x}^j) \quad (1)$$

831

832 Where  $x^i$  and  $x^j$  are time series recorded from different sensors summed across multiple timepoints  
833  $t$  divided by the total number of timepoints  $N$ .

834 Spatial covariance matrices (SCMs) were computed as the set of pairwise covariance estimates  
835 between all sensors (i.e., 306 x 306 sensors, including both gradiometers and magnetometers), all  
836 reconstructed sources (i.e., 5124 x 5124 sources), and all parcellated sources (i.e., 360 x 360  
837 parcels). Covariance estimation can be unstable when the sample size (i.e., trial number) is small  
838 and the number of variables (i.e., sensors or sources) is large. Therefore, we used a shrinkage

839 method for covariance estimation<sup>63</sup> (OAS) that improves numerical stability and ensures that the  
840 matrix is symmetric, positive definite, and thus invertible.

841

#### 842 *Data Simulation*

843

844 Simulated data was generated to compare the performance of different decoding methods using a  
845 model of electrophysiological data as close as possible to MEG recordings. We generated time  
846 series by summing up three different components. (1) Sinusoidal waves representing endogenous  
847 brain signals associated with the experimental task. (2) Band-limited noise representing  
848 uncorrelated background brain activity was simulated by summing 50 sinusoids having random  
849 frequencies ranging from 1 Hz to 125 Hz, and random phases ranging from 0 to  $2\pi$ . (3) Pink noise  
850 representing the typical 1/f spectral signature of electrophysiological signals was simulated by  
851 constructing a power spectral density function for which power is inversely proportional to  
852 frequency and applying an inverse fourier transform.

853 Moreover, we simulated data such that it reflected two main characteristics of endogenous brain  
854 signals associated with internally driven cognitive processes, like visual imagery. On the one hand,  
855 we added random delays to signal onsets and offsets to account for the fact that endogenous brain  
856 signals are not time-locked across trials. On the other hand, We simulated data in 100 trials and 3  
857 recording channels for two different conditions. The two conditions were associated with different  
858 spatial configurations that we artificially created by changing the signal to noise (SNR) ratio in the  
859 three recording channels. In particular, we simulated data such that the first and the second channel  
860 were associated with higher SNR in one condition, while the first and the third channel were  
861 associated with higher SNR in another condition.

862

#### 863 *Baseline Correction*

864

865 To rule out the possibility that decoding performance was driven by task-irrelevant individual  
866 differences in brain activity and/or brain connectivity we performed a baseline correction. For  
867 classic time-domain decoding, the mean of the signal measured in the baseline period was  
868 subtracted from the signal measured during the trial epoch. For covariance-based decoding, we  
869 used a whitening transformation to remove the covariance measured in the baseline period from  
870 the covariance measured during the trial epoch.

871

#### 872 *Decoding Analysis*

873

874 We used two different decoding methods: classic *time-domain decoding* and *covariance-based*  
875 *decoding*. From a methodological point of view, these two decoding methods differ in terms of the  
876 brain features used for classification. Time-domain decoding features were obtained by  
877 concatenating the raw MEG time-series measured from different sensors into a vector. Covariance-  
878 based decoding features were obtained by using a kernel transformation to project spatial  
879 covariance matrices from a Riemannian manifold to a locally homeomorphic Euclidean tangent  
880 space.

881 We built a decoding pipeline using scikit-learn toolbox<sup>64</sup>. This decoding pipeline was applied to  
882 MEG data collected from individual subjects. Trial epochs were segmented using a sliding time-  
883 window. For each time window, we obtained a classification score. We used three different time-  
884 window sizes: 100 ms, 500 ms, 1 s. For time-domain decoding, we standardized the MEG signal

885 by estimating the mean and the standard deviation for each trial and each time-window. For  
886 covariance-based decoding, we estimated the spatial covariance matrices for each trial and each  
887 time-window. After that, we vectorized our input features following two alternative approaches.  
888 For time-domain decoding, we concatenated MEG time series from different recording channels  
889 into a single vector for each trial. For covariance-based decoding, we approximated geodesic  
890 distances in the Riemannian manifold to Euclidean distances in the tangent space (see Fig. 1G)  
891 obtaining a tangent vector for each trial. Then, we used a logistic regression model for binary  
892 classification of imagined faces and places trials. In this model, the probabilities of the possible  
893 outcomes for each trial are modeled using a logistic function. L2 regularization was applied in  
894 order to improve numerical stability. Optimization was performed using a coordinate descent (CD)  
895 algorithm that minimizes the cost function by adjusting weights and regularization parameters.  
896 Finally, we used the Area Under the Receiver Operating Characteristic Curve (ROC AUC) as a  
897 scoring metric. This scoring metric takes into account the tradeoff between true and false positive  
898 rates.

899

### 900 *MRI-Based Source Reconstruction*

901

902 High-resolution T1-weighted anatomical scans were acquired for most of participants (seven over  
903 eleven) in a 4T Bruker MedSpec Biospin MR scanner with an 8-channel birdcage head coil (MP-  
904 RAGE; 1x1x1 mm; FOV, 256 x 224; 176 slices; TR = 2700 ms; TE = 4.18 ms; inversion time (TI),  
905 1020 ms; 7-degrees flip angle). When the anatomical scans were not available (four over eleven  
906 participants) we used a template brain to perform source reconstruction<sup>65</sup>. This template brain was  
907 the average of the anatomical scans collected from 40 subjects ('fsaverage'). The template brain  
908 was deformed to match the headshape of the participants that we measured using the Polhemus  
909 Fastrak digitizer (Polhemus, Vermont, USA). For group analysis, we computed a linear  
910 interpolation (i.e., morphing) between the individual source model and the template brain for each  
911 subject.

912 The anatomical scans were 3D reconstructed using Freesurfer software<sup>66</sup>. A Boundary Element  
913 Model (BEM) was estimated using the watershed algorithm. MRI and MEG coordinate systems  
914 were co-registered by manually matching digitized anatomical fiducial landmarks on the  
915 participant's T1 scan. The resulting whole brain surface reconstruction (5124 vertices; 6.2 mm  
916 average source spacing), the BEM model and the aligned coordinate frames were used to compute  
917 the 3D forward model for MEG source reconstruction. The inverse operator was estimated using  
918 the noise-covariance matrix, the forward solution and the source covariance matrix. We used the  
919 Minimum-norm Estimates<sup>67</sup> (MNE) for reconstruction of neuronal sources. We used a loose  
920 orientation constraint for source reconstruction. In particular, for each source location we estimated  
921 a gain matrix having three columns corresponding to magnetic fields  $x$ ,  $y$ , and  $z$  orientations. Then,  
922 we computed the norm of these three vectors to obtain one single vector for each source location.

923

### 924 *Cortical Parcellation*

925

926 To obtain a fine-grained spatial definition of cortical areas and link our results to previous  
927 neuroscience literature, we subdivided the reconstructed sources into cortical areas using a  
928 multimodal parcellation atlas<sup>68</sup>. This atlas identifies 360 cortical areas (180 per hemisphere) based  
929 on cortical architecture, function, connectivity, and topography. For task-relevant and task-  
930 irrelevant sub-network analysis we grouped multiple parcels into larger regions following atlas

931 definitions. Each region included a set of spatially contiguous cortical areas sharing common  
932 properties, based on architecture, task-fMRI activity profiles, and functional connectivity. In  
933 particular, we selected five larger groups of regions for the task-relevant sub-network analysis: (1)  
934 *visual* regions including the following 24 areas for each hemisphere: V1, V2, V3, V3A, V3B,  
935 V3CD, V4, V4t, V6A, V7, V8, VMV1, VMV2, VMV3, ProS, PH, FST, IPS1, MST, MT, LO1,  
936 LO2, LO3; (2) *parietal* regions including the following 13 areas for each hemisphere: AIP, MIP,  
937 VIP, LIPd, LIPv, IP0, IP1, IP2, 7AL, 7Am, 7PC, 7PL, 7Pm; (3) *temporal* regions including the  
938 following 10 areas for each hemisphere: EC, FFC, H, PHA1, PHA2, PHA3, PIT, PeEC, PreS,  
939 VVC; (4) *frontal* regions including the following 7 areas for each hemisphere: 44, 45, IFJa, IFJp,  
940 47l, IFSp, IFSa, p47r; (5) posterior cingulate regions including the following 7 areas for each  
941 hemisphere: DVT, RSC, PCV, POS1, POS2, 7m, v23ab. In addition we selected three larger groups  
942 of regions for the task-irrelevant sub-network analysis: (1) *motor* regions including the following  
943 10 areas for each hemisphere: 4, 55b, 6a, 6d, 6ma, 6mp, 6r, 6v, PEF, SCEF; (2) *primary auditory*  
944 regions including the following 5 areas for each hemisphere: A1, LBelt, MBelt, PBelt, RI; (3)  
945 *secondary auditory* regions including the following 8 areas for each hemisphere: A4, A5, STGa,  
946 STSda, STSdp, STSva, STSvp, TA2.

#### 947 948 *Statistical Analysis*

949  
950 Decoding performance was evaluated using statistical tests to establish whether classification was  
951 significant both at the single subject level and at the group level.

952 At the single subject level, we used cross-validation and permutation tests to assess the decoding  
953 performance for each time window. In particular, we used a stratified k-fold cross-validation  
954 procedure. Data were divided into five folds and classification scores were obtained for each fold.  
955 Then, cross-validated decoding performance was estimated by averaging the scores obtained for  
956 each fold. Moreover, we ran a permutation test to evaluate the statistical significance of cross-  
957 validated scores. This test consisted in repeating the cross-validated classification procedure 1000  
958 times permuting condition labels. We computed the p-value as the percentage of tests for which  
959 the classification score obtained with un-permuted labels was greater than the classification score  
960 obtained with permuted labels.

961 At the group level, we evaluated cross-validated decoding performance across multiple subjects  
962 using Bayesian hypothesis testing<sup>69</sup>. To account for the different number of trials per participant  
963 resulting from trial exclusion, we used a statistical test that weighs the classification scores for each  
964 participant depending on the amount of trials used to train and test the classifier. When we  
965 performed more than one test for one single decoding analysis (e.g., sub-network analysis) we  
966 corrected for multiple comparisons using False Discovery Rate (FDR) correction.

967 To investigate which nodes provided most information to covariance-based decoding, we ran a  
968 cluster-based permutation test<sup>70</sup> (CBPT) both in sensor space and source space. CBPT consists of  
969 two different stages: a cluster formation stage and an inferential stage.

970 In the cluster formation stage, the unit-level statistic is computed for each sensor or source. We  
971 used a two-sample covariance matrix<sup>71</sup> unit-level statistic that was estimated as follows: first, we  
972 estimated the spatial covariance matrices for each trial; then, we computed the element-wise mean  
973 covariance matrix and the element-wise variance covariance matrix for each condition; finally, we  
974 computed an M (i.e., matrix) standardized statistic that is defined as the squared difference of the  
975 mean covariance matrices divided by the sum of the variance covariance matrices. The test statistic  
976 is reported in Equation 2:



977

978

$$M_{ij(sxs)} := \frac{(\bar{c}_{ij}^{y1} - \bar{c}_{ij}^{y2})^2}{\frac{\sigma(\bar{c}_{ij}^{y1})}{N_{y1}} + \frac{\sigma(\bar{c}_{ij}^{y2})}{N_{y2}}}, \quad 1 \leq i \leq j \leq s \quad (2)$$

979

980

981

982

983

984

985

986

987

988

989

990

991

992

993

994

Where  $M$  is a  $s \times s$  (i.e., sensors-by-sensors or sources-by-sources) matrix,  $\bar{c}$  is the averaged element-wise covariance estimated between recording channels  $i$  and  $j$  belonging to either condition  $y1$  or condition  $y2$ , and  $\sigma$  squared is the averaged element-wise variance divided by the number of trials  $N$  in each condition. Once we obtained the  $M$  matrix, we summed across rows to obtain one single score for each sensor or source measuring the difference in covariance between the two conditions. Given that the distribution of the  $M$  standardized statistic is unknown, we run a permutation test under the null hypothesis of exchangeability. We computed the unit-level test statistic 1000 times. For each iteration, assignment to experimental conditions was randomized. Then, the original  $M$  values were compared to permuted  $M$  values yielding uncorrected  $p$ -values. Sensors or sources were selected according to an a priori defined alpha criterion (i.e.,  $p < 0.05$ ) and adjacent sensors or sources not exceeding this value were grouped together into clusters. Finally, we summed all the  $M$  values within each cluster (i.e.,  $\text{maxsum}$ ) obtaining one single number. Minimum cluster size was set to 5 sensors or 50 vertices. A spatial adjacency matrix containing information about sensors or sources proximity was taken into account in the cluster formation stage.

995

996

997

998

999

In the inferential stage, the stored unit-level permutation values summed within clusters were used to compute the cluster-level statistical distribution under the null hypothesis of exchangeability. We calculated the percentage of clusters for which the un-permuted cluster-level statistic was larger than the permuted cluster-level statistic. If the cluster  $p$ -value was smaller than 0.05 then we assumed that the data in the two experimental conditions were significantly different.

1000

1001

1002

1003

1004

1005

1006

1007

1008

1009

1010

1011

1012

1013

1014

1015

1016

1017

1018

1019

1020

1021 **References**

1022

- 1023 1. Pearson, J. (2019). The human imagination: the cognitive neuroscience of visual mental  
1024 imagery. *Nature Reviews Neuroscience*, 20(10), 624-634.
- 1025 2. Treisman, A. (1996). The binding problem. *Current opinion in neurobiology*, 6(2), 171-  
1026 178.
- 1027 3. Tononi, G., Edelman, G. M., & Sporns, O. (1998). Complexity and coherency: integrating  
1028 information in the brain. *Trends in cognitive sciences*, 2(12), 474-484.
- 1029 4. Tononi, G., Sporns, O., & Edelman, G. M. (1992). Reentry and the problem of integrating  
1030 multiple cortical areas: Simulation of dynamic integration in the visual system. *Cerebral*  
1031 *Cortex*, 2(4), 310-335.
- 1032 5. Van Essen, D. C., Anderson, C. H., & Felleman, D. J. (1992). Information processing in  
1033 the primate visual system: an integrated systems perspective. *Science*, 255(5043), 419-423.
- 1034 6. Singer, W., & Gray, C. M. (1995). Visual feature integration and the temporal correlation  
1035 hypothesis. *Annual review of neuroscience*, 18(1), 555-586.
- 1036 7. Kosslyn, S. M., Thompson, W. L., Klm, I. J., & Alpert, N. M. (1995). Topographical  
1037 representations of mental images in primary visual cortex. *Nature*, 378(6556), 496-498.
- 1038 8. Goebel, R., Khorrām-Sefat, D., Muckli, L., Hacker, H., & Singer, W. (1998). The  
1039 constructive nature of vision: direct evidence from functional magnetic resonance imaging  
1040 studies of apparent motion and motion imagery. *European Journal of Neuroscience*, 10(5),  
1041 1563-1573.
- 1042 9. O'Craven, K. M., & Kanwisher, N. (2000). Mental imagery of faces and places activates  
1043 corresponding stimulus-specific brain regions. *Journal of cognitive neuroscience*, 12(6),  
1044 1013-1023.
- 1045 10. Sakai, K., & Miyashita, Y. (1994). Visual imagery: an interaction between memory  
1046 retrieval and focal attention. *Trends Neurosci*, 17(7), 287-289.
- 1047 11. Ishai, A., Ungerleider, L. G., & Haxby, J. V. (2000). Distributed neural systems for the  
1048 generation of visual images. *Neuron*, 28(3), 979-990.
- 1049 12. Mechelli, A., Price, C. J., Friston, K. J., & Ishai, A. (2004). Where bottom-up meets top-  
1050 down: neuronal interactions during perception and imagery. *Cerebral cortex*, 14(11), 1256-  
1051 1265.
- 1052 13. Watrous, A. J., Tandon, N., Conner, C. R., Pieters, T., & Ekstrom, A. D. (2013). Frequency-  
1053 specific network connectivity increases underlie accurate spatiotemporal memory retrieval.  
1054 *Nature neuroscience*, 16(3), 349-356.
- 1055 14. Baldauf, D., & Desimone, R. (2014). Neural mechanisms of object-based attention.  
1056 *Science*, 344(6182), 424-427.
- 1057 15. Haynes, J. D., & Rees, G. (2006). Decoding mental states from brain activity in humans.  
1058 *Nature Reviews Neuroscience*, 7(7), 523-534.
- 1059 16. Isik, L., Meyers, E. M., Leibo, J. Z., & Poggio, T. (2014). The dynamics of invariant object  
1060 recognition in the human visual system. *Journal of neurophysiology*, 111(1), 91-102.
- 1061 17. Cichy, R. M., Pantazis, D., & Oliva, A. (2014). Resolving human object recognition in  
1062 space and time. *Nature neuroscience*, 17(3), 455-462.
- 1063 18. Brandman, T., & Peelen, M. V. (2017). Interaction between scene and object processing  
1064 revealed by human fMRI and MEG decoding. *Journal of Neuroscience*, 37(32), 7700-7710.
- 1065 19. Dijkstra, N., Mostert, P., de Lange, F. P., Bosch, S., & van Gerven, M. A. (2018).  
1066 Differential temporal dynamics during visual imagery and perception. *Elife*, 7, e33904.

- 1067 20. Linde-Domingo, J., Treder, M. S., Kerrén, C., & Wimber, M. (2019). Evidence that neural  
1068 information flow is reversed between object perception and object reconstruction from  
1069 memory. *Nature communications*, 10(1), 1-13.
- 1070 21. Bainbridge, W. A., Hall, E. H., & Baker, C. I. (2021). Distinct representational structure  
1071 and localization for visual encoding and recall during visual imagery. *Cerebral Cortex*,  
1072 31(4), 1898-1913.
- 1073 22. Barachant, A., Bonnet, S., Congedo, M., & Jutten, C. (2013). Classification of covariance  
1074 matrices using a Riemannian-based kernel for BCI applications. *Neurocomputing*, 112,  
1075 172-178.
- 1076 23. Tong, F. (2013). Imagery and visual working memory: one and the same?. *Trends in*  
1077 *cognitive sciences*, 17(10), 489-490.
- 1078 24. Kosslyn, S. M. (1988). Aspects of a cognitive neuroscience of mental imagery. *Science*,  
1079 240(4859), 1621-1626.
- 1080 25. Vidaurre, D., Myers, N. E., Stokes, M., Nobre, A. C., & Woolrich, M. W. (2019).  
1081 Temporally unconstrained decoding reveals consistent but time-varying stages of stimulus  
1082 processing. *Cerebral Cortex*, 29(2), 863-874.
- 1083 26. Ragni, F., Lingnau, A., & Turella, L. (2021). Decoding category and familiarity information  
1084 during visual imagery. *NeuroImage*, 241, 118428.
- 1085 27. Koles, Z. J., Lazar, M. S., & Zhou, S. Z. (1990). Spatial patterns underlying population  
1086 differences in the background EEG. *Brain topography*, 2(4), 275-284.
- 1087 28. Thomas, K. P., Guan, C., Lau, C. T., Vinod, A. P., & Ang, K. K. (2009). A new  
1088 discriminative common spatial pattern method for motor imagery brain-computer  
1089 interfaces. *IEEE Transactions on Biomedical Engineering*, 56(11), 2730-2733.
- 1090 29. Bressler, S. L., & Menon, V. (2010). Large-scale brain networks in cognition: emerging  
1091 methods and principles. *Trends in cognitive sciences*, 14(6), 277-290.
- 1092 30. Bassett, D. S., & Sporns, O. (2017). Network neuroscience. *Nature neuroscience*, 20(3),  
1093 353-364.
- 1094 31. Shirer, W. R., Ryali, S., Rykhlevskaia, E., Menon, V., & Greicius, M. D. (2012). Decoding  
1095 subject-driven cognitive states with whole-brain connectivity patterns. *Cerebral cortex*,  
1096 22(1), 158-165.
- 1097 32. Scarselli, F., Gori, M., Tsoi, A. C., Hagenbuchner, M., & Monfardini, G. (2008). The graph  
1098 neural network model. *IEEE transactions on neural networks*, 20(1), 61-80.
- 1099 33. Brandt, S. A., & Stark, L. W. (1997). Spontaneous eye movements during visual imagery  
1100 reflect the content of the visual scene. *Journal of cognitive neuroscience*, 9(1), 27-38.
- 1101 34. Mostert, P., Albers, A. M., Brinkman, L., Todorova, L., Kok, P., & De Lange, F. P. (2018).  
1102 Eye movement-related confounds in neural decoding of visual working memory  
1103 representations. *Eneuro*, 5(4).
- 1104 35. Quax, S. C., Dijkstra, N., van Staveren, M. J., Bosch, S. E., & van Gerven, M. A. (2019).  
1105 Eye movements explain decodability during perception and cued attention in MEG.  
1106 *Neuroimage*, 195, 444-453.
- 1107 36. Corbetta, M., Akbudak, E., Conturo, T. E., Snyder, A. Z., Ollinger, J. M., Drury, H. A., ...  
1108 & Shulman, G. L. (1998). A common network of functional areas for attention and eye  
1109 movements. *Neuron*, 21(4), 761-773.
- 1110 37. Keogh, R., & Pearson, J. (2018). The blind mind: No sensory visual imagery in aphantasia.  
1111 *Cortex*, 105, 53-60.

- 1112 38. Bainbridge, W. A., Pounder, Z., Eardley, A. F., & Baker, C. I. (2021). Quantifying  
1113 aphantasia through drawing: Those without visual imagery show deficits in object but not  
1114 spatial memory. *Cortex*, 135, 159-172.
- 1115 39. Ishai, A., Schmidt, C. F., & Boesiger, P. (2005). Face perception is mediated by a  
1116 distributed cortical network. *Brain research bulletin*, 67(1-2), 87-93.
- 1117 40. Epstein, R. A., & Baker, C. I. (2019). Scene perception in the human brain. *Annual review*  
1118 *of vision science*, 5, 373.
- 1119 41. Shafritz, K. M., Gore, J. C., & Marois, R. (2002). The role of the parietal cortex in visual  
1120 feature binding. *Proceedings of the National Academy of Sciences*, 99(16), 10917-10922.
- 1121 42. Bisiach, E., & Luzzatti, C. (1978). Unilateral neglect of representational space. *Cortex*,  
1122 14(1), 129-133.
- 1123 43. Kreiman, G., Koch, C., & Fried, I. (2000). Imagery neurons in the human brain. *Nature*,  
1124 408(6810), 357-361.
- 1125 44. Slotnick, S. D., Thompson, W. L., & Kosslyn, S. M. (2012). Visual memory and visual  
1126 mental imagery recruit common control and sensory regions of the brain. *Cognitive*  
1127 *neuroscience*, 3(1), 14-20.
- 1128 45. Formisano, E., Linden, D. E., Di Salle, F., Trojano, L., Esposito, F., Sack, A. T., ... &  
1129 Goebel, R. (2002). Tracking the mind's image in the brain I: time-resolved fMRI during  
1130 visuospatial mental imagery. *Neuron*, 35(1), 185-194.
- 1131 46. Andersson, P., Ragni, F., & Lingnau, A. (2019). Visual imagery during real-time fMRI  
1132 neurofeedback from occipital and superior parietal cortex. *NeuroImage*, 200, 332-343.
- 1133 47. Yomogida, Y., Sugiura, M., Watanabe, J., Akitsuki, Y., Sassa, Y., Sato, T., ... &  
1134 Kawashima, R. (2004). Mental visual synthesis is originated in the fronto-temporal network  
1135 of the left hemisphere. *Cerebral Cortex*, 14(12), 1376-1383.
- 1136 48. Fox, M. D., Snyder, A. Z., Vincent, J. L., Corbetta, M., Van Essen, D. C., & Raichle, M. E.  
1137 (2005). The human brain is intrinsically organized into dynamic, anticorrelated functional  
1138 networks. *Proceedings of the National Academy of Sciences*, 102(27), 9673-9678.
- 1139 49. Duncan, J., & Owen, A. M. (2000). Common regions of the human frontal lobe recruited  
1140 by diverse cognitive demands. *Trends in neurosciences*, 23(10), 475-483.
- 1141 50. Dehaene, S., Kerszberg, M., & Changeux, J. P. (1998). A neuronal model of a global  
1142 workspace in effortful cognitive tasks. *Proceedings of the national Academy of Sciences*,  
1143 95(24), 14529-14534.
- 1144 51. Schlegel, A., Kohler, P. J., Fogelson, S. V., Alexander, P., Konuthula, D., & Tse, P. U.  
1145 (2013). Network structure and dynamics of the mental workspace. *Proceedings of the*  
1146 *National Academy of Sciences*, 110(40), 16277-16282.
- 1147 52. Dentico, D., Cheung, B. L., Chang, J. Y., Guokas, J., Boly, M., Tononi, G., & Van Veen,  
1148 B. (2014). Reversal of cortical information flow during visual imagery as compared to  
1149 visual perception. *Neuroimage*, 100, 237-243.
- 1150 53. Dijkstra, N., Zeidman, P., Ondobaka, S., van Gerven, M. A., & Friston, K. (2017). Distinct  
1151 top-down and bottom-up brain connectivity during visual perception and imagery.  
1152 *Scientific reports*, 7(1), 1-9.
- 1153 54. Yuille, A., & Kersten, D. (2006). Vision as Bayesian inference: analysis by synthesis?.  
1154 *Trends in cognitive sciences*, 10(7), 301-308.
- 1155 55. Rao, R. P., & Ballard, D. H. (1999). Predictive coding in the visual cortex: a functional  
1156 interpretation of some extra-classical receptive-field effects. *Nature neuroscience*, 2(1), 79-  
1157 87.

- 1158 56. Lupyan, G., & Spivey, M. J. (2010). Making the invisible visible: Verbal but not visual  
1159 cues enhance visual detection. *PloS one*, 5(7), e11452.
- 1160 57. Marks, D. F. (1973). Visual imagery differences in the recall of pictures. *British journal of*  
1161 *Psychology*, 64(1), 17-24.
- 1162 58. Kleiner, M., Brainard, D., & Pelli, D. (2007). What's new in Psychtoolbox-3?.
- 1163 59. Salvucci, D. D., & Goldberg, J. H. (2000, November). Identifying fixations and saccades  
1164 in eye-tracking protocols. In *Proceedings of the 2000 symposium on Eye tracking research*  
1165 *& applications* (pp. 71-78).
- 1166 60. Gramfort, A., Luessi, M., Larson, E., Engemann, D. A., Strohmeier, D., Brodbeck, C., ... &  
1167 Hämäläinen, M. (2013). MEG and EEG data analysis with MNE-Python. *Frontiers in*  
1168 *neuroscience*, 267.
- 1169 61. Taulu, S., & Simola, J. (2006). Spatiotemporal signal space separation method for rejecting  
1170 nearby interference in MEG measurements. *Physics in Medicine & Biology*, 51(7), 1759.
- 1171 62. Makeig, S., Bell, A., Jung, T. P., & Sejnowski, T. J. (1995). Independent component  
1172 analysis of electroencephalographic data. *Advances in neural information processing*  
1173 *systems*, 8.
- 1174 63. Chen, Y., Wiesel, A., Eldar, Y. C., & Hero, A. O. (2010). Shrinkage algorithms for MMSE  
1175 covariance estimation. *IEEE Transactions on Signal Processing*, 58(10), 5016-5029.
- 1176 64. Pedregosa, F., Varoquaux, G., Gramfort, A., Michel, V., Thirion, B., Grisel, O., ... &  
1177 Duchesnay, E. (2011). Scikit-learn: Machine learning in Python. *the Journal of machine*  
1178 *Learning research*, 12, 2825-2830.
- 1179 65. Douw, L., Nieboer, D., Stam, C. J., Tewarie, P., & Hillebrand, A. (2018). Consistency of  
1180 magnetoencephalographic functional connectivity and network reconstruction using a  
1181 template versus native MRI for co-registration. *Human brain mapping*, 39(1), 104-119.
- 1182 66. Fischl, B., Sereno, M. I., & Dale, A. M. (1999). Cortical surface-based analysis: II:  
1183 inflation, flattening, and a surface-based coordinate system. *Neuroimage*, 9(2), 195-207.
- 1184 67. Hämäläinen, M. S., & Ilmoniemi, R. J. (1994). Interpreting magnetic fields of the brain:  
1185 minimum norm estimates. *Medical & biological engineering & computing*, 32(1), 35-42.
- 1186 68. Glasser, M. F., Coalson, T. S., Robinson, E. C., Hacker, C. D., Harwell, J., Yacoub, E., ...  
1187 & Van Essen, D. C. (2016). A multi-modal parcellation of human cerebral cortex. *Nature*,  
1188 536(7615), 171-178.
- 1189 69. Olivetti, E., Veeramachaneni, S., & Nowakowska, E. (2012). Bayesian hypothesis testing  
1190 for pattern discrimination in brain decoding. *Pattern Recognition*, 45(6), 2075-2084.
- 1191 70. Maris, E., & Oostenveld, R. (2007). Nonparametric statistical testing of EEG-and MEG-  
1192 data. *Journal of neuroscience methods*, 164(1), 177-190.
- 1193 71. Cai, T., Liu, W., & Xia, Y. (2013). Two-sample covariance matrix testing and support  
1194 recovery in high-dimensional and sparse settings. *Journal of the American Statistical*  
1195 *Association*, 108(501), 265-277.

1196  
1197  
1198  
1199  
1200  
1201  
1202  
1203

1204 **Acknowledgments**

1205

1206 The authors would like to thank Gianpiero Maniolla and Davide Tabareli for their technical  
1207 support during data acquisition. The authors also thank Omri Raccach, Arianna Zuanazzi, Joan  
1208 Orpella and David Poeppel for helpful comments on the manuscript.

1209

1210 **Funding:**

1211 Fondazione Cassa di Risparmio di Trento e Rovereto (DB)

1212

1213 **Author contributions:**

1214 Conceptualization: PS, DB

1215 Methodology: FM, EO

1216 Investigation: PS, FM

1217 Visualization: FM

1218 Supervision: EO, DB

1219 Writing—original draft: FM

1220 Writing—review & editing: PS, EO, DB

1221

1222 **Competing interests:**

1223 All other authors declare they have no competing interests.

1224

1225 **Data and materials availability:**

1226 All data are available in the main text or the supplementary materials.

1227
